# Supplementary material
Source: Springer Nature journal article supplement (https://www.springermedizin.de/resource/supplementary/12913_2013_3740_MOESM6_ESM.pdf/9532248)
Supplement: MOESM6 [file 9532248]

## Red cell acetyl cholinesterase (AChE)/ Plasma cholinesterase PChE - BHT Record

Study No: **Po 6285**  
 Name:  
 Age: **26**  
 Sex: **M**

BHT No:  
 Poison ingested: **Quinalphos**  
 Amount: **100mls**  
 Date/time ingested: **13.00hr 2/1/2008**

**Rough Guidelines (not validated)**  
 Normal AChE 80-100%  
 Mod severe poisoning Q: 20-50%  
 Severe poisoning Q: <20%  
 Normal PChE range 1.35 - 3.23 U/ml

(write post PAM results here)

| Pre or Post PAM dose | Code  | Date     | Time  | AChE %N | PChE U/ml (1.35 - 3.23) | AChE %N | PChE U/ml (1.35 - 3.23) | Resp Rate | neck power | GCS (m/v/e) | Atropine infusion rate | Symptomatic (C, N, C&N, Asy, Atr) |
|----------------------|-------|----------|-------|---------|-------------------------|---------|-------------------------|-----------|------------|-------------|------------------------|-----------------------------------|
| PRE-Pam              | T=0p  | 02/01/08 | 17.10 | -2%     | 0.07                    |         |                         |           |            |             |                        |                                   |
| PAM dose (if given)  | ①     | 2/1/08   | 17.15 |         |                         |         |                         |           |            |             |                        |                                   |
| 1hour POST -Pam      | T=1p  | 2/1/08   | 18.30 |         |                         | 44%     | 0.07                    |           |            |             |                        |                                   |
| PRE-Pam              | T=6p  | 2/1/08   | 22.40 | 13%     | 0.04                    |         |                         |           |            |             |                        |                                   |
| PAM dose (if given)  | ②     | 2/1/08   | 23.00 |         |                         |         |                         |           |            |             |                        |                                   |
| 1hour POST -Pam      | T=7p  | 2/1/08   | 23.50 |         |                         | 52%     | 0.02                    |           |            |             |                        |                                   |
| PRE-Pam              | T=18p | 3/1/08   | 7.55  | 5%      | -0.04                   |         |                         |           |            |             |                        |                                   |
| PAM dose (if given)  | ④     |          |       |         |                         |         |                         |           |            |             |                        |                                   |
| 1hour POST -Pam      | T=19p | 3/1/08   | 10.30 |         |                         | 24%     | 0.05                    |           |            |             |                        |                                   |
| PRE-Pam              | T=2X  | 3/1/08   | 20.00 | 16%     | -0.04                   |         |                         |           |            |             |                        |                                   |
| PAM dose (if given)  | -     |          |       |         |                         |         |                         |           |            |             |                        |                                   |
| 1hour POST -Pam      | -     |          |       |         |                         |         |                         |           |            |             |                        |                                   |
| PRE-Pam              | T=42p | 4/1/08   | 8.10  | 6%      | 0.0                     |         |                         |           |            |             |                        |                                   |
| PAM dose (if given)  | ⑧     | 4/1/08   | 8.30  |         |                         |         |                         |           |            |             |                        |                                   |
| 1hour POST -Pam      | T=43p | 4/1/08   | 9.40  |         |                         | 39%     | 0.03                    |           |            |             |                        |                                   |
| PRE-Pam              | Tx2   | 4/1/08   | 14.10 | 29%     | -0.17                   |         |                         |           |            |             |                        |                                   |
| PAM dose (if given)  |       |          |       |         |                         |         |                         |           |            |             |                        |                                   |
| 1hour POST -Pam      | T=0p  | 5/1/08   | 19.30 | 2%      | -0.07                   |         |                         |           |            |             |                        |                                   |

Normal Values of red blood cell acetylcholinesterase (RBC-AChE) and plasma cholinesterase (PChE) were provided

Numeric values of AChE, exact times of blood tests, and oxime (pralidoxime) doses were recorded here

|                 |                    |
|-----------------|--------------------|
| (copy from BHT) | Doses of PAM given |
| Date            |                    |
| Pralidoxime     |                    |

### Rbc-AChE for patients receiving PAM

- 1st PAM course
- 2nd Pam course
- Pam course

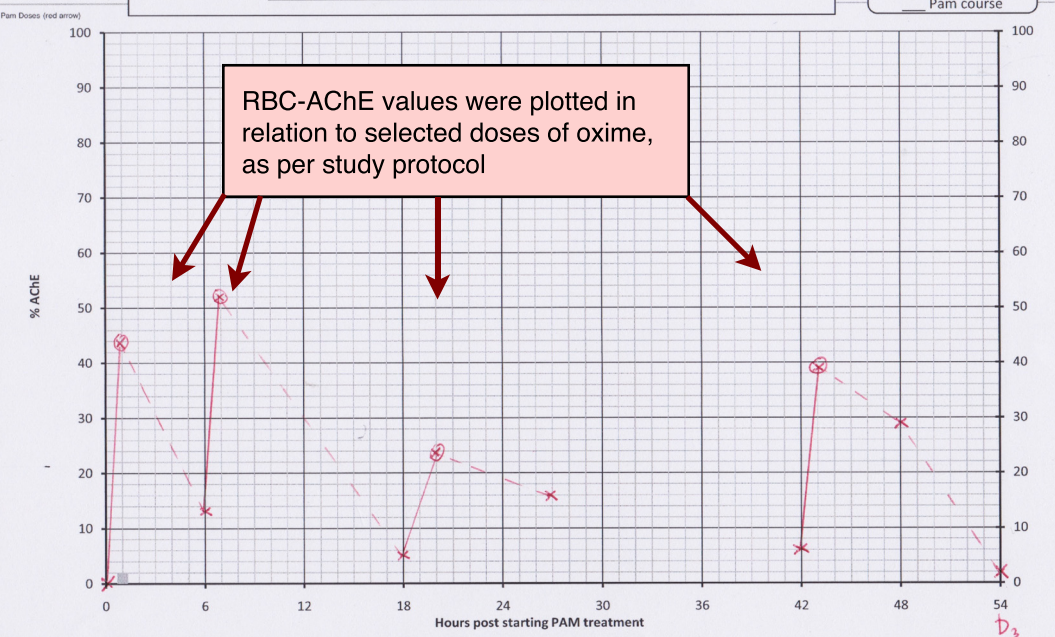

D<sub>3</sub>
